# Supplementary material for: Oncogenic Ras mutant causes the hyperactivation of NF‐κB via acceleration of its transcriptional activation
Source: PubMed Central journal article supplement (PMC6822247; doi:10.1002/1878-0261.12580), 2019-10-18
Supplement: MOL2-13-2493-s001.pdf [file MOL2-13-2493-s001.pdf]

## Supplementary Figures

For:

**Oncogenic Ras mutant causes the hyper-activation of NF- $\kappa$ B via acceleration of its transcriptional activation.**

Kenji Tago<sup>1, \*</sup>, Megumi Funakoshi-Tago<sup>2</sup>, Satoshi Ohta<sup>1</sup>, Hirotohi Kawata<sup>3</sup>, Hiroshi Saitoh<sup>1</sup>, Hisanaga Horie<sup>4</sup>, Chihiro Aoki-Ohmura<sup>1</sup>, Junji Yamauchi<sup>5</sup>, Akira Tanaka<sup>3</sup>, Jitsuhiro Matsugi<sup>1</sup> and Ken Yanagisawa<sup>1</sup>

<sup>1</sup> Division of Structural Biochemistry, Department of Biochemistry, <sup>3</sup>Department of Pathology, <sup>4</sup>Department of Surgery, Jichi Medical University, 3311-1 Yakushiji, Shimotsuke, Tochigi, Japan, 321-0498, <sup>2</sup> Division of Hygienic Chemistry, Faculty of Pharmacy, Keio University, 1-5-30 Shibakoen, Minato-ku, Tokyo 105-8512, Japan, <sup>5</sup> Laboratory of Molecular Neuroscience and Neurology, Tokyo University of Pharmacy and Life Sciences, Hachioji, Tokyo, 192-0392, Japan

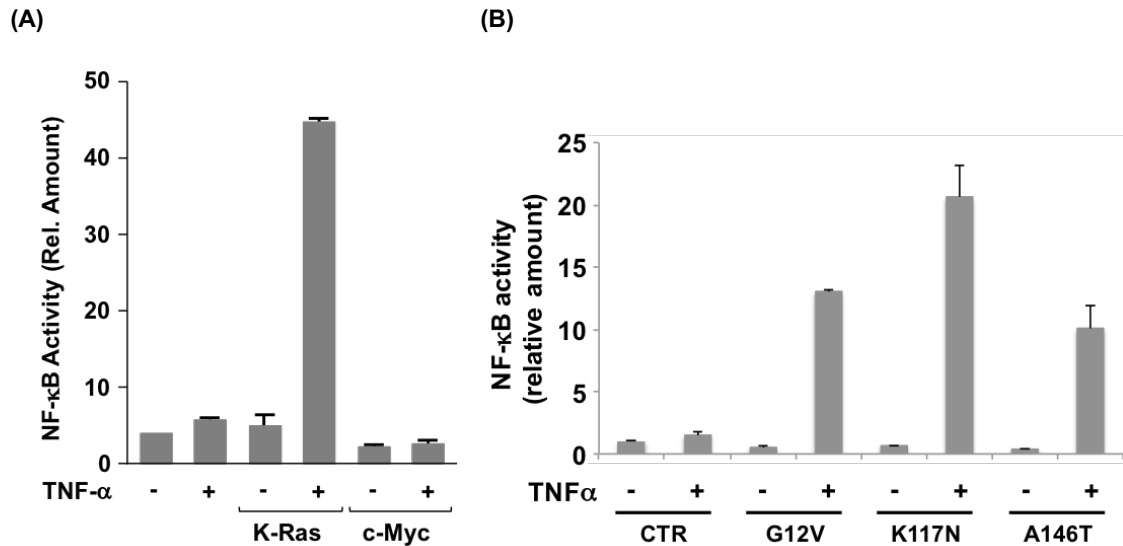

**Supplementary Figure 1**

(A) KF-8 cells were infected with control retroviruses or retroviruses harboring K-Ras (G12V) or c-Myc. After puromycin selection, cells were stimulated with 10  $\mu$ g/ml TNF $\alpha$  for indicated periods. Then, cells were lysed, and the luciferase assay was performed. (B) Using KF-8 cells infected with control retroviruses or retroviruses harboring K-Ras mutants including G12V, K117N and A146T, the luciferase assay was performed as shown in (A). In the graph, error bars = S.D. (n=3, \*P<0.005).

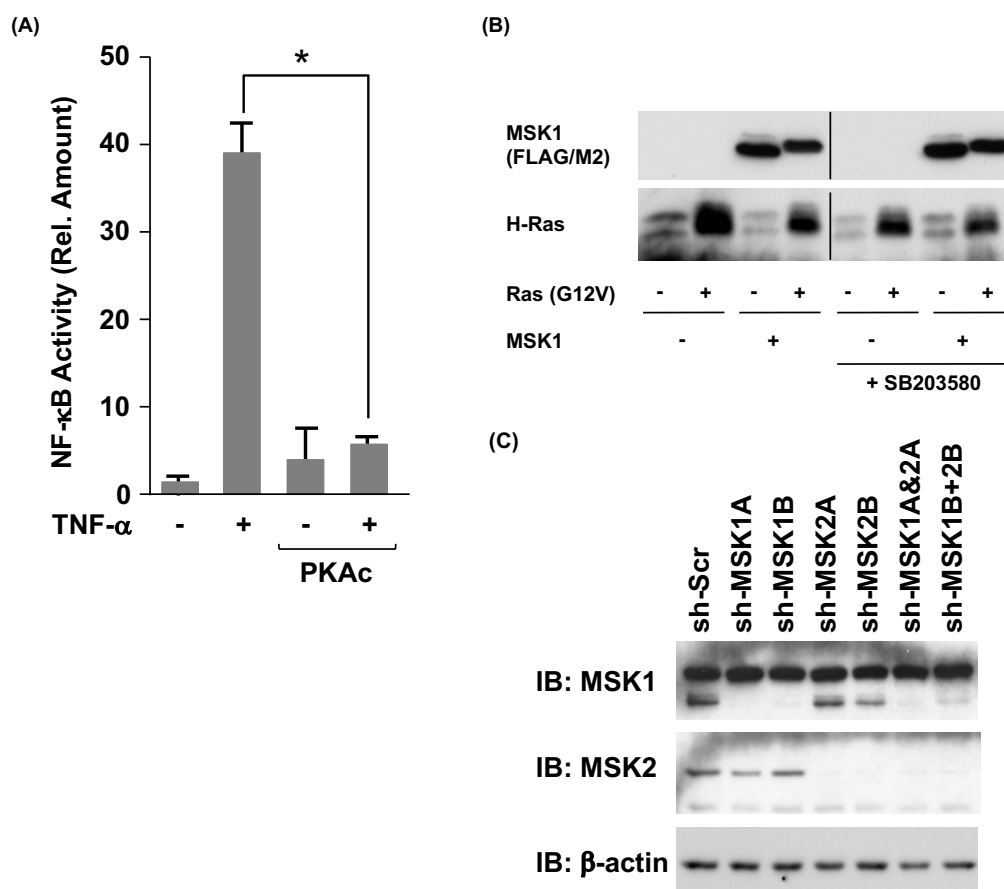

### Supplementary Figure 2

(A) HEK293T cells were transfected with a luciferase vector including  $\kappa$ B-responsive element with/without FLAG-PKAc, a catalytic subunit of PKA. Then, using the transfected cells, luciferase assays were performed. In graph, error bars indicate standard deviation (S.D., n=3), and the results of calculations of independent t-tests are shown (\* $P$ <0.005). (B) The expression of FLAG-MSK1 and H-Ras (G12V) in cells analyzed for *in vitro* kinase assay (Figure 5A) was analyzed by immunoblotting analysis using antibodies against FLAG-tag (M2) and H-Ras. (C) KF-8 cells were infected with retroviruses harboring scrambled short-hairpin RNA, sh-MSK1 (1A or 1B) or sh-MSK2 (2A or 2B). After puromycin selection, cells were lysed, and immunoblotting analysis was performed to evaluate the knockdown efficiency of MSK1 and MSK2.  $\beta$ -actin was used as a loading control.

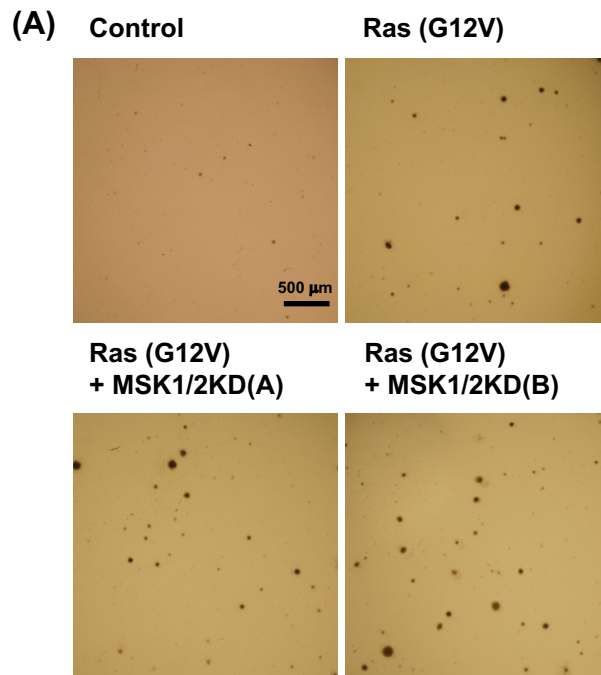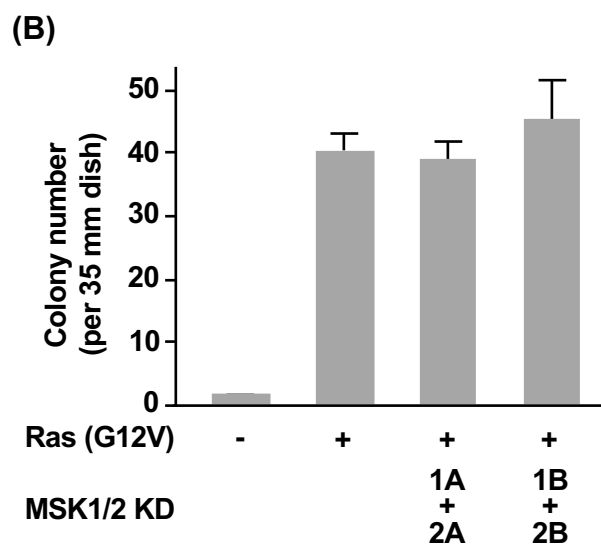

### Supplementary Figure 3

(A) NIH-3T3 cells were infected with indicated retroviruses as described in Figure 5B. After puromycin selection, cells ( $1 \times 10^4$  cells) were seeded on soft agar media in 35 mm dishes. After 3 weeks, the number of colonies were counted and shown in graph as shown in (B). In the graph, error bars = S.D. ( $n=3$ ,  $*P<0.005$ ). In the photograph, 500  $\mu\text{m}$  scale bar was shown.

**(A) ICAM1**

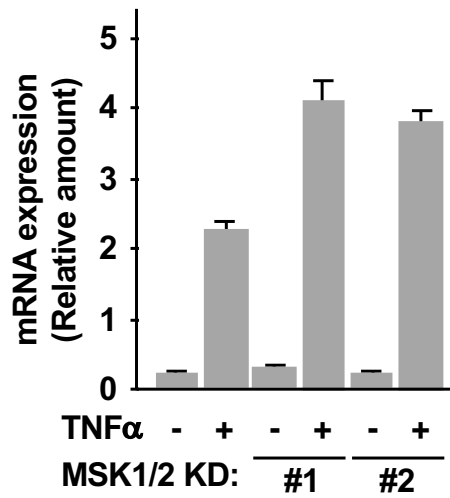

**(B) A20**

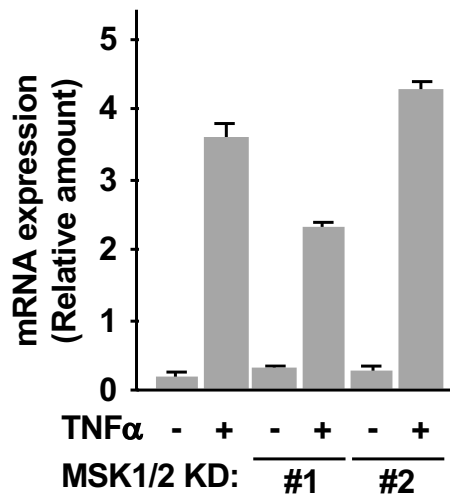

**Supplementary Figure 4**

SW620, a colorectal cancer-derived cell line was transfected with siRNAs against both MSK1 and MSK2. Forty-eight hr later, cells were stimulated with/without 10 ng/mL TNF $\alpha$  for 3 h, and then total RNAs were extracted from these cells. The expressions of NF- $\kappa$ B target genes, ICAM1 and A20 were analyzed by quantitative RT-PCR, and results were shown in the graphs (A) and (B). In the graph, error bars = S.D. (n=3, \* $P$ <0.005).

**Kras Genotype (Exon2) T001-T-008**

|   | 1            | 2            | 3            | 4            | 5             | 6 | 7            | 8            | 9            | 10           | 11             |
|---|--------------|--------------|--------------|--------------|---------------|---|--------------|--------------|--------------|--------------|----------------|
| A | T001<br>G12S | T002<br>G12S | T003<br>G12S | T004<br>G12S | water<br>G12S |   | T005<br>G12S | T006<br>G12S | T007<br>G12S | T008<br>G12S | water2<br>G12S |
| B | T001<br>G12R | T002<br>G12R | T003<br>G12R | T004<br>G12R | water<br>G12R |   | T005<br>G12R | T006<br>G12R | T007<br>G12R | T008<br>G12R | water2<br>G12R |
| C | T001<br>G12C | T002<br>G12C | T003<br>G12C | T004<br>G12C | water<br>G12C |   | T005<br>G12C | T006<br>G12C | T007<br>G12C | T008<br>G12C | water2<br>G12C |
| D | T001<br>G12D | T002<br>G12D | T003<br>G12D | T004<br>G12D | water<br>G12D |   | T005<br>G12D | T006<br>G12D | T007<br>G12D | T008<br>G12D | water2<br>G12D |
| E | T001<br>G12A | T002<br>G12A | T003<br>G12A | T004<br>G12A | water<br>G12A |   | T005<br>G12A | T006<br>G12A | T007<br>G12A | T008<br>G12A | water2<br>G12A |
| F | T001<br>G12V | T002<br>G12V | T003<br>G12V | T004<br>G12V | water<br>G12V |   | T005<br>G12V | T006<br>G12V | T007<br>G12V | T008<br>G12V | water2<br>G12V |
| G | T001<br>G13D | T002<br>G13D | T003<br>G13D | T004<br>G13D | water<br>G13D |   | T005<br>G13D | T006<br>G13D | T007<br>G13D | T008<br>G13D | water2<br>G13D |

**Kras Genotype (Exon2) T009-T-019**

|   | 1            | 2            | 3            | 4            | 5            | 6            | 7            | 8            | 9            | 10           | 11           | 12                   |
|---|--------------|--------------|--------------|--------------|--------------|--------------|--------------|--------------|--------------|--------------|--------------|----------------------|
| A | T009<br>G12S | T010<br>G12S | T011<br>G12S | T012<br>G12S | T013<br>G12S | T014<br>G12S | T015<br>G12S | T016<br>G12S | T017<br>G12S | T018<br>G12S | T019<br>G12S | Negative CTR<br>G12S |
| B | T009<br>G12R | T010<br>G12R | T011<br>G12R | T012<br>G12R | T013<br>G12R | T014<br>G12R | T015<br>G12R | T016<br>G12R | T017<br>G12R | T018<br>G12R | T019<br>G12R | Negative CTR<br>G12R |
| C | T009<br>G12C | T010<br>G12C | T011<br>G12C | T012<br>G12C | T013<br>G12C | T014<br>G12C | T015<br>G12C | T016<br>G12C | T017<br>G12C | T018<br>G12C | T019<br>G12C | Negative CTR<br>G12C |
| D | T009<br>G12D | T010<br>G12D | T011<br>G12D | T012<br>G12D | T013<br>G12D | T014<br>G12D | T015<br>G12D | T016<br>G12D | T017<br>G12D | T018<br>G12D | T019<br>G12D | Negative CTR<br>G12D |
| E | T009<br>G12A | T010<br>G12A | T011<br>G12A | T012<br>G12A | T013<br>G12A | T014<br>G12A | T015<br>G12A | T016<br>G12A | T017<br>G12A | T018<br>G12A | T019<br>G12A | Negative CTR<br>G12A |
| F | T009<br>G12V | T010<br>G12V | T011<br>G12V | T012<br>G12V | T013<br>G12V | T014<br>G12V | T015<br>G12V | T016<br>G12V | T017<br>G12V | T018<br>G12V | T019<br>G12V | Negative CTR<br>G12V |
| G | T009<br>G13D | T010<br>G13D | T011<br>G13D | T012<br>G13D | T013<br>G13D | T014<br>G13D | T015<br>G13D | T016<br>G13D | T017<br>G13D | T018<br>G13D | T019<br>G13D | Negative CTR<br>G13D |

**Kras Genotype (Exon2) T020-T-030**

|   | 1            | 2            | 3            | 4            | 5            | 6            | 7            | 8            | 9            | 10           | 11           | 12            |
|---|--------------|--------------|--------------|--------------|--------------|--------------|--------------|--------------|--------------|--------------|--------------|---------------|
| A | T020<br>G12S | T021<br>G12S | T022<br>G12S | T023<br>G12S | T024<br>G12S | T025<br>G12S | T026<br>G12S | T027<br>G12S | T028<br>G12S | T029<br>G12S | T030<br>G12S | Water<br>G12S |
| B | T020<br>G12R | T021<br>G12R | T022<br>G12R | T023<br>G12R | T024<br>G12R | T025<br>G12R | T026<br>G12R | T027<br>G12R | T028<br>G12R | T029<br>G12R | T030<br>G12R | Water<br>G12R |
| C | T020<br>G12C | T021<br>G12C | T022<br>G12C | T023<br>G12C | T024<br>G12C | T025<br>G12C | T026<br>G12C | T027<br>G12C | T028<br>G12C | T029<br>G12C | T030<br>G12C | Water<br>G12C |
| D | T020<br>G12D | T021<br>G12D | T022<br>G12D | T023<br>G12D | T024<br>G12D | T025<br>G12D | T026<br>G12D | T027<br>G12D | T028<br>G12D | T029<br>G12D | T030<br>G12D | Water<br>G12D |
| E | T020<br>G12A | T021<br>G12A | T022<br>G12A | T023<br>G12A | T024<br>G12A | T025<br>G12A | T026<br>G12A | T027<br>G12A | T028<br>G12A | T029<br>G12A | T030<br>G12A | Water<br>G12A |
| F | T020<br>G12V | T021<br>G12V | T022<br>G12V | T023<br>G12V | T024<br>G12V | T025<br>G12V | T026<br>G12V | T027<br>G12V | T028<br>G12V | T029<br>G12V | T030<br>G12V | Water<br>G12V |
| G | T020<br>G13D | T021<br>G13D | T022<br>G13D | T023<br>G13D | T024<br>G13D | T025<br>G13D | T026<br>G13D | T027<br>G13D | T028<br>G13D | T029<br>G13D | T030<br>G13D | Water<br>G13D |

| Patient Number | KRas mutation |
|----------------|---------------|
| 006            | G13D          |
| 007            | G12S/G12C     |
| 009            | G12D          |
| 016            | G12D          |
| 022            | G13D          |
| 026            | G12V          |
| 030            | G12D          |

**Supplementary Figure 5**

Genomic DNA was extracted from tumor tissues of 30 colorectal cancer patients (designated as T001 to T030). To detect K-Ras mutations such as G12S, G12R, G12C, G12D, G12A, G12V, and G13D, quantitative PCR was performed. Detected K-Ras mutations are colored purple (homozygous) or yellow (heterozygous). As result, it was concluded that 7 colorectal cancer patients (006, 007, 009, 016, 022, 026, and 030) harbored K-Ras mutations in exon 2 of the K-Ras gene.

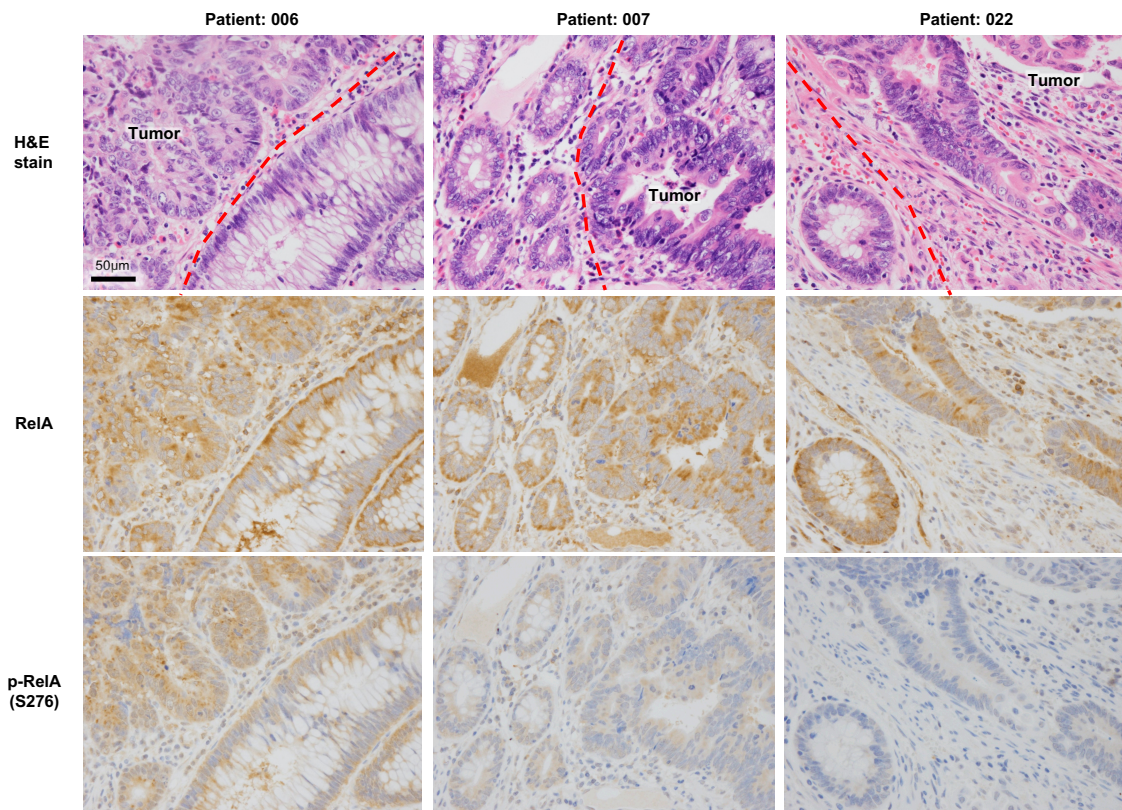

### Supplementary Figure 6

Utilizing paired samples of tumor and normal tissues from K-Ras (+) patients, immunohistochemical analyses were performed to detect total p65/RelA and phosphorylated p65/RelA (Ser276). H & E staining is also shown to distinguish tumor and normal tissues. Among 7 patients, 2 samples (009 and 016) were shown in Figure 7A. In the photograph, 50 µm scale bar was shown excepting patient 026 including 100 µm scale bar.

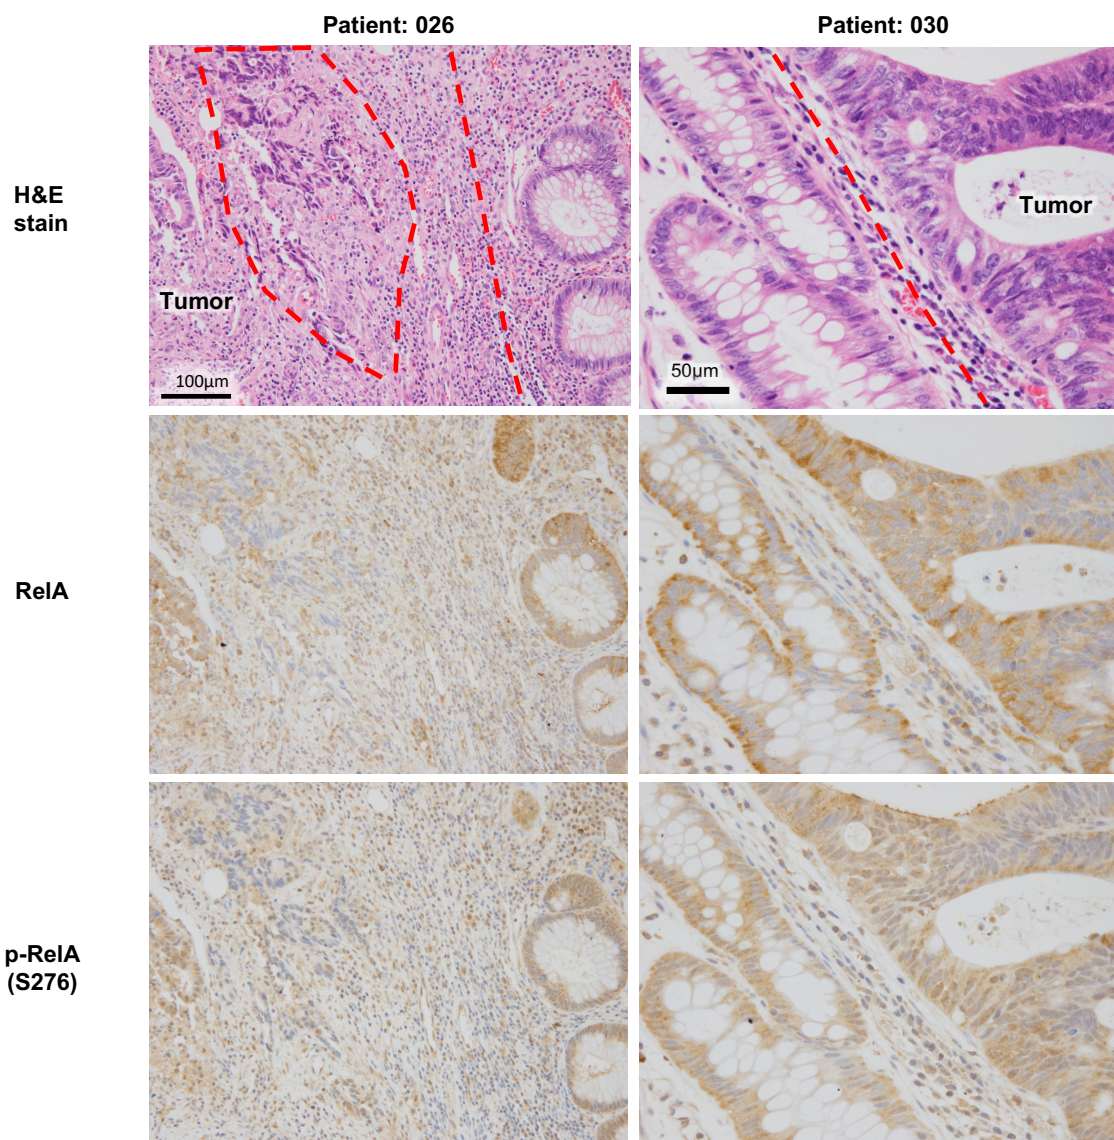

**Supplementary Figure 6**

**(Continued)**



### COX-2

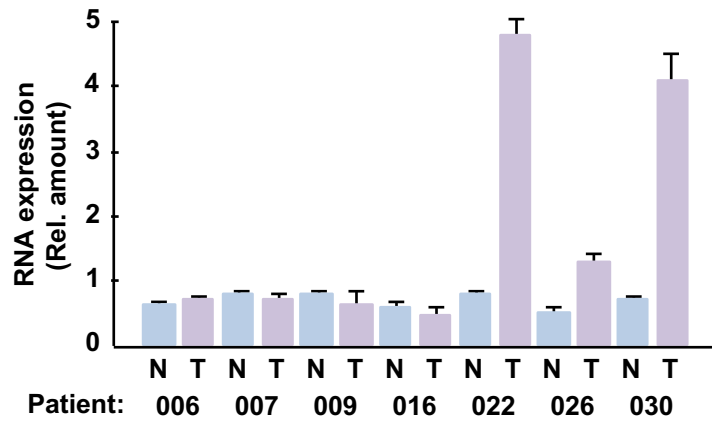

### VEGF

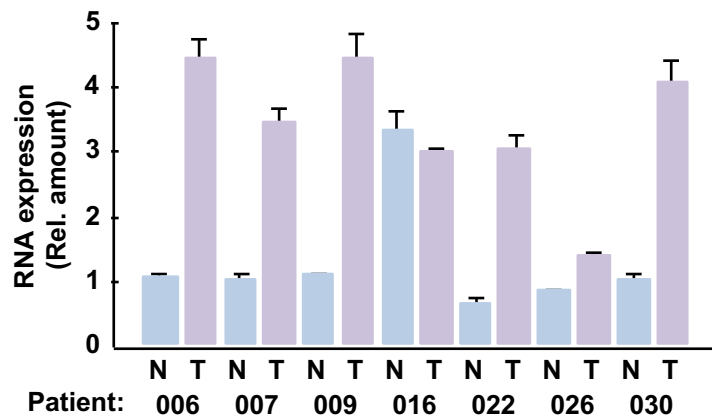

### Supplementary Figure 7

Total RNA was extracted from normal and tumor tissues from each patient harboring K-Ras mutations. Then, quantitative RT-PCR was performed to evaluate the mRNA expression of COX-2 and VEGF. In the graph, error bars = S.D. (n=3).
