# Supplementary material for: Oncogenic Ras mutant causes the hyperactivation of NF‐κB via acceleration of its transcriptional activation
Source: PubMed Central journal article supplement (PMC6822247; doi:10.1002/1878-0261.12580), 2019-10-18
Supplement: MOL2-13-2493-s002.pdf [file MOL2-13-2493-s002.pdf]

**Supplementary Table 1: Primers used in quantitative PCR for NF- $\kappa$ B target genes**

| <b>Analyzed Gene</b> | <b>Primers</b> | <b>Sequences</b>        |
|----------------------|----------------|-------------------------|
| <b>COX2</b>          | Forward Primer | GTGCAACACTTGAGTGGCTAT   |
|                      | Reverse Primer | GCAATTTGCCTGGTGAATGAT   |
| <b>ICAM1</b>         | Forward Primer | AAGGATGGCACTTTCCCACT    |
|                      | Reverse Primer | GTGATGATGACAATCTCATACCG |
| <b>A20</b>           | Forward Primer | GGGTGGAATTTACTTGCC      |
|                      | Reverse Primer | AGGGTCACCAAGGGTACA      |
| <b>VEGF</b>          | Forward Primer | CGGCGAAGAGAAGAGACACATTG |
|                      | Reverse Primer | CGGGAAGGGAAGGGAAGGAC    |
| <b>Ubiquitin</b>     | Forward Primer | GGAAGGCATTCCTCCTGAT     |
|                      | Reverse Primer | CCCACCTCTGAGACGGAGTA    |
