# Supplementary material for: Oncogenic Ras mutant causes the hyperactivation of NF‐κB via acceleration of its transcriptional activation
Source: PubMed Central journal article supplement (PMC6822247; doi:10.1002/1878-0261.12580), 2019-10-18
Supplement: MOL2-13-2493-s003.pdf [file MOL2-13-2493-s003.pdf]

Supplementary Table 2: Primers used for genotyping of KRas gene

| KRas mutation | Primer/Probe             | Sequences                       |
|---------------|--------------------------|---------------------------------|
| c.34G>A       | Forward primer           | TGCTGAAAATGACTGAATATAAACTTGTGG  |
|               | Reverse primer           | GCTGTATCGTCAAGGCACTCTT          |
|               | Probe for WT KRas (VIC)  | <b>TTGGAGCTGGTGGCGTA</b>        |
|               | Probe for mut KRas (FAM) | <b>TAGTTGGAGCTAGTGGCGTA</b>     |
| c.34G>C       | Forward primer           | TGCTGAAAATGACTGAATATAAACTTGTGG  |
|               | Reverse primer           | GCTGTATCGTCAAGGCACTCTT          |
|               | Probe for WT KRas (VIC)  | <b>TTGGAGCTGGTGGCGTA</b>        |
|               | Probe for mut KRas (FAM) | <b>TTGGAGCTCGTGGCGTA</b>        |
| c.34G>T       | Forward primer           | TGCTGAAAATGACTGAATATAAACTTGTGG  |
|               | Reverse primer           | GCTGTATCGTCAAGGCACTCTT          |
|               | Probe for WT KRas (VIC)  | <b>TTGGAGCTGGTGGCGTA</b>        |
|               | Probe for mut KRas (FAM) | <b>TTGGAGCTTGTGGCGTA</b>        |
| c.35G>A       | Forward primer           | GCTGAAAATGACTGAATATAAACTTGTGGTA |
|               | Reverse primer           | GCTGTATCGTCAAGGCACTCTT          |
|               | Probe for WT KRas (VIC)  | <b>TTGGAGCTGGTGGCGTA</b>        |
|               | Probe for mut KRas (FAM) | <b>TTGGAGCTGATGGCGTA</b>        |
| c.35G>C       | Forward primer           | TGCTGAAAATGACTGAATATAAACTTGTGG  |
|               | Reverse primer           | GCTGTATCGTCAAGGCACTCTT          |
|               | Probe for WT KRas (VIC)  | <b>TTGGAGCTGGTGGCGTA</b>        |
|               | Probe for mut KRas (FAM) | <b>TTGGAGCTGCTGGCGTA</b>        |
| c.35G>T       | Forward primer           | TGCTGAAAATGACTGAATATAAACTTGTGG  |
|               | Reverse primer           | GCTGTATCGTCAAGGCACTCTT          |
|               | Probe for WT KRas (VIC)  | <b>TTGGAGCTGGTGGCGTA</b>        |
|               | Probe for mut KRas (FAM) | <b>TTGGAGCTGTTGGCGTA</b>        |
| c.38G>A       | Forward primer           | TGCTGAAAATGACTGAATATAAACTTGTGG  |
|               | Reverse primer           | GAATTAGCTGTATCGTCAAGGCACT       |
|               | Probe for WT KRas (VIC)  | <b>CTTGCCTACGCCACCAG</b>        |
|               | Probe for mut KRas (FAM) | <b>CTTGCCTACGTCACCAG</b>        |
